# Supplementary material for: Molecular response patterns in relapsed/refractory AML patients treated with selinexor and chemotherapy
Source: PubMed Central journal article supplement (PMC9889470; doi:10.1007/s00277-022-05075-4), 2022-12-28

**Molecular response patterns in relapsed/refractory AML patients treated with selinexor and chemotherapy**

**Supplementary information**

**Supplementary Tables**

**Supplementary Table S1. Genes included in our custom myeloid panel.**

| <b>Gene</b>    | <b>Exons</b> | <b>Gene</b>   | <b>Exons</b>       | <b>Gene</b>   | <b>Exons</b>              |
|----------------|--------------|---------------|--------------------|---------------|---------------------------|
| <i>ASXL1</i>   | 12           | <i>GATA2</i>  | 2-6                | <i>RUNX1</i>  | complete                  |
| <i>ASXL2</i>   | 11+12        | <i>IDH1</i>   | 4                  | <i>SETBP1</i> | 4                         |
| <i>BCOR</i>    | complete     | <i>IDH2</i>   | 4                  | <i>SF3B1</i>  | 13-16                     |
| <i>BCORL1</i>  | complete     | <i>JAK2</i>   | 12, 14             | <i>SMC1A</i>  | 2, 11, 16,<br>17          |
| <i>BRAF</i>    | Exon15       | <i>KDM6A</i>  | complete           | <i>SMC3</i>   | 10, 13, 19,<br>23, 25, 28 |
| <i>CALR</i>    | 9            | <i>KIT</i>    | 2, 8-11, 13,<br>17 | <i>SRSF2</i>  | 1                         |
| <i>CBL</i>     | 8, 9         | <i>KRAS</i>   | 2-5                | <i>STAG1</i>  | complete                  |
| <i>CEBPA</i>   | complete     | <i>MPL</i>    | 10                 | <i>STAG2</i>  | complete                  |
| <i>CSF3R</i>   | 14-17        | <i>MYC</i>    | 2                  | <i>TET2</i>   | 3-11                      |
| <i>CSNK1A1</i> | 3, 4         | <i>NF1</i>    | complete           | <i>TP53</i>   | 2-11                      |
| <i>DDX41</i>   | complete     | <i>NPM1</i>   | 12                 | <i>U2AF1</i>  | 2, 6                      |
| <i>DNMT3A</i>  | complete     | <i>NRAS</i>   | 2-5                | <i>WT1</i>    | 7, 9                      |
| <i>ETNK1</i>   | 3            | <i>PHF6</i>   | complete           | <i>ZBTB7A</i> | 2, 3                      |
| <i>ETV6</i>    | complete     | <i>PPM1D</i>  | 1-6                | <i>ZRSR2</i>  | complete                  |
| <i>EZH2</i>    | complete     | <i>PTPN11</i> | 3, 13              |               |                           |
| <i>FLT3</i>    | 14-16, 20    | <i>RAD21</i>  | complete           |               |                           |

**Supplementary Table S2. Primer sequences used for NGS MRD analysis.**

| Primer name            | Primer sequence                                                  |
|------------------------|------------------------------------------------------------------|
| SF3B1_NGS_64<br>8F     | GGTAAACACAAGGGCACTGGNNNNNNNNNNNNNNNNNGCA<br>TTCCTTCTTTATTGCCCTTC |
| SF3B1_NGS_64<br>8R     | CGGACTACAGCTCCCATCATNNNNNNNNNNNNNNNNNACTT<br>CTAAGATGTGGCAAGATGG |
| SRSF2_NGS_6<br>9_120LF | GGTAAACACAAGGGCACTGGNNNNNNNNTGAGGACGCTA<br>TGGATGCC              |
| SRSF2_NGS_6<br>9_120LR | CGGACTACAGCTCCCATCATNNNNNNNNNcctcagccccgtttacC<br>TG             |

**Supplementary Table S3. Comparison of patient demographics and baseline characteristics of included and excluded patients.**

| Characteristic                       | Included patients (n=15) | Excluded patients (n=27) | P            |
|--------------------------------------|--------------------------|--------------------------|--------------|
| Age                                  |                          |                          | <b>0.019</b> |
| Median (years)                       | 49.1                     | 59.6                     |              |
| Range (years)                        | 29-72                    | 35-78                    |              |
| Sex                                  |                          |                          | 0.78         |
| Male - no. (%)                       | 9 (60)                   | 15 (56)                  |              |
| Female - no. (%)                     | 6 (40)                   | 12 (44)                  |              |
| ECOG performance status at diagnosis |                          |                          | 0.48         |
| 0 - no. (%)                          | 10 (66)                  | 4 (15)                   |              |
| 1 - no. (%)                          | 3 (20)                   | 0 (0)                    |              |
| 2 - no. (%)                          | 1 (7)                    | 0 (0)                    |              |
| Missing data - no. (%)               | 1 (7)                    | 23 (85)                  |              |
| ECOG performance status              |                          |                          | 0.49         |
| 0 - no. (%)                          | 6 (40)                   | 8 (30)                   |              |
| 1 - no. (%)                          | 5 (33)                   | 12 (44)                  |              |
| 2 - no. (%)                          | 1 (7)                    | 1 (4)                    |              |
| 3 - no. (%)                          | 1 (7)                    | 0 (0)                    |              |
| Missing data - no. (%)               | 2 (13)                   | 6 (22)                   |              |
| Type of AML                          |                          |                          | 0.37         |
| De novo - no. (%)                    | 11 (73)                  | 19 (70)                  |              |

|                                                                  |          |          |              |
|------------------------------------------------------------------|----------|----------|--------------|
| Secondary* - no. (%)                                             | 4 (27)   | 5 (19)   |              |
| Therapy-related -no. (%)                                         | 0 (0)    | 3 (11)   |              |
| Cytogenetic risk group                                           |          |          | 0.874        |
| Favorable/intermediate – no. (%)                                 | 9 (60)   | 16 (59)  |              |
| Adverse – no. (%)                                                | 4 (27)   | 8 (30)   |              |
| missing data - no. (%)                                           | 2 (13)   | 3 (11)   |              |
| ELN at SAIL screening (9)                                        |          |          | 0.571        |
| Favorable/intermediate – no. (%)                                 | 5 (33)   | 3 (11)   |              |
| Unfavorable – no. (%)                                            | 7 (47)   | 7 (26)   |              |
| Missing data – no. (%)                                           | 3 (20)   | 17 (63)  |              |
| WBC count                                                        |          |          | 0.38         |
| Median - (x10 <sup>9</sup> /l)                                   | 4.17     | 8.53     |              |
| Range - (x10 <sup>9</sup> /l)                                    | 0.6-12.9 | 0.4-85.0 |              |
| Hemoglobin                                                       |          |          | 0.075        |
| Median – g/dL                                                    | 9.21     | 10.22    |              |
| Range – g/dL                                                     | 7.1-12.5 | 8.3-13.4 |              |
| Platelet count                                                   |          |          | <b>0.027</b> |
| Median - (x10 <sup>9</sup> /l)                                   | 46.64    | 101.38   |              |
| Range - (x10 <sup>9</sup> /l)                                    | 10-98    | 3-346    |              |
| Prior HCT                                                        |          |          | 0.307        |
| Yes – no. (%)                                                    | 8 (53)   | 10 (37)  |              |
| No – no. (%)                                                     | 7 (47)   | 17 (63)  |              |
| aGVHD in patients receiving an allograft or DLIs (n=12; n=7)     |          |          | 0.4          |
| Yes – no. (%)                                                    | 8 (73)   | 2 (7)    |              |
| No – no. (%)                                                     | 3 (27)   | 0 (0)    |              |
| Missing data - no. (%)                                           | 0 (0)    | 25 (93)  |              |
| cGVHD in transplanted receiving an allograft or DLIs (n=12; n=7) |          |          | 0.4          |
| Yes – no. (%)                                                    | 3 (20)   | 0 (0)    |              |
| No – no. (%)                                                     | 8 (53)   | 2 (7)    |              |
| Missing data - no. (%)                                           | 4 (27)   | 25 (93)  |              |
| Treatment after SAIL                                             |          |          | 0.011        |

|                                      |          |         |       |
|--------------------------------------|----------|---------|-------|
| Yes – no. (%)                        | 15 (100) | 9 (33)  |       |
| No – no. (%)                         | 0 (0)    | 5 (19)  |       |
| Missing data - no. (%)               | 0 (0)    | 13 (48) |       |
| Type of treatment after SAIL         |          |         | 0.077 |
| alloHCT- no. (%)**                   | 9 (60)   | 7 (26)  |       |
| DLI - no. (%)                        | 3 (20)   | 2 (7)   |       |
| Intensive Chemotherapy - no. (%)     | 2 (13)   | 0 (0)   |       |
| Non-intensive chemotherapy - no. (%) | 1 (7)    | 0 (0)   |       |
| No treatment - no. (%)               | 0 (0)    | 5 (19)  |       |
| Missing data - no. (%)               | 0 (0)    | 13 (48) |       |

Abbreviations: ECOG, performance status of the Eastern Cooperative Oncology Group; ELN, European LeukemiaNet; WBC, white blood cell count; HCT, hematopoietic stem cell transplantation; alloHCT, allogeneic hematopoietic stem cell transplantation; aGvHD, acute graft-versus-host disease; cGvHD, chronic graft-versus-host disease; DLI, donor lymphocyte infusion; P, P-value from two-sided chi-squared tests for categorical variables and from two-sided Student's T or Kolmogorov-Smirnov tests for continuous variables.

\* secondary AML developing after an antecedent hematologic disorder;

\*\* three patients received a second alloHCT.

**Supplementary Table S4. Patient demographics and baseline characteristics (n=15).**

| Characteristic                       | Included patients (n=15) |
|--------------------------------------|--------------------------|
| Age                                  |                          |
| Median (years)                       | 49.1                     |
| Range (years)                        | 29-72                    |
| Sex                                  |                          |
| Male - no. (%)                       | 9 (60)                   |
| Female - no. (%)                     | 6 (40)                   |
| ECOG performance status at diagnosis |                          |
| 0 - no. (%)                          | 10 (66)                  |
| 1 - no. (%)                          | 3 (20)                   |
| 2 - no. (%)                          | 1 (7)                    |
| Missing data - no. (%)               | 1 (7)                    |
| ECOG performance status              |                          |
| 0 - no. (%)                          | 6 (40)                   |
| 1 - no. (%)                          | 5 (33)                   |
| 2 - no. (%)                          | 1 (7)                    |
| 3 - no. (%)                          | 1 (7)                    |
| Missing data - no. (%)               | 2 (13)                   |
| Type of AML                          |                          |
| De novo - no. (%)                    | 11 (73)                  |
| Secondary* - no. (%)                 | 4 (27)                   |
| Therapy-related -no. (%)             | 0 (0)                    |
| Cytogenetic risk group               |                          |
| Favorable/intermediate – no. (%)     | 9 (60)                   |
| Adverse – no. (%)                    | 4 (27)                   |
| missing data - no. (%)               | 2 (13)                   |
| ELN at SAIL screening (9)            |                          |
| Favorable/intermediate – no. (%)     | 5 (33)                   |
| Unfavorable – no. (%)                | 7 (47)                   |
| Missing data – no. (%)               | 3 (20)                   |
| WBC count                            |                          |
| Median - (x10 <sup>9</sup> /l)       | 4.17                     |
| Range - (x10 <sup>9</sup> /l)        | 0.6-12.9                 |
| Hemoglobin                           |                          |
| Median – g/dL                        | 9.21                     |
| Range – g/dL                         | 7.1-12.5                 |

|                                                             |          |
|-------------------------------------------------------------|----------|
| Platelet count                                              |          |
| Median - (x10 <sup>9</sup> /l)                              | 46.64    |
| Range - (x10 <sup>9</sup> /l)                               | 10-98    |
| Prior HCT                                                   |          |
| Yes – no. (%)                                               | 8 (53)   |
| No – no. (%)                                                | 7 (47)   |
| aGvHD in patients receiving an allograft or DLIs (n=12)     |          |
| Yes – no. (%)                                               | 8 (73)   |
| No – no. (%)                                                | 3 (27)   |
| cGvHD in transplanted receiving an allograft or DLIs (n=12) |          |
| Yes – no. (%)                                               | 3 (27)   |
| No – no. (%)                                                | 8 (73)   |
| Treatment after SAIL                                        |          |
| Yes – no. (%)                                               | 15 (100) |
| No – no. (%)                                                | 0 (0)    |
| Type of treatment after SAIL                                |          |
| alloHCT- no. (%)                                            | 9 (60)   |
| DLI - no. (%)                                               | 3 (20)   |
| Intensive chemotherapy - no. (%)                            | 2 (13)   |
| Non-intensive chemotherapy - no. (%)                        | 1 (7)    |
| No treatment - no. (%)                                      | 0 (0)    |
| Missing data - no. (%)                                      | 0 (0)    |

Abbreviations: ECOG, performance status of the Eastern Cooperative Oncology Group; ELN, European LeukemiaNet; WBC, white blood cell count; HCT, hematopoietic stem cell transplantation; alloHCT, allogeneic hematopoietic stem cell transplantation; aGvHD, acute graft-versus-host disease; cGvHD, chronic graft-versus-host disease; DLI, donor lymphocyte infusion; P, P-value from two-sided chi-squared tests for categorical variables and from two-sided Student's T or Kolmogorov-Smirnov tests for continuous variables.

\* secondary AML developing after an antecedent hematologic disorder;

\*\* three patients received a second alloHCT.

**Supplementary Table S5. Comparison of clinical characteristics between CR/CRi (n=7) and all other patients (n=8).**

| Characteristic                       | All (n=15) | CR/CRi after induction chemotherapy n=7 | All others (MLFS, SD, PR, PD, after induction) n=8 | P     |
|--------------------------------------|------------|-----------------------------------------|----------------------------------------------------|-------|
| Age                                  |            |                                         |                                                    | 0.586 |
| Median (years)                       | 49.1       | 46.7                                    | 51.3                                               |       |
| Range (years)                        | 29-72      | 34-72                                   | 29-69                                              |       |
| Sex                                  |            |                                         |                                                    | 0.398 |
| Male - no. (%)                       | 9 (60)     | 5 (71)                                  | 4 (50)                                             |       |
| Female - no. (%)                     | 6 (40)     | 2 (29)                                  | 4 (50)                                             |       |
| ECOG performance status at diagnosis |            |                                         |                                                    | 0.061 |
| 0 - no. (%)                          | 10 (66)    | 7 (100)                                 | 3 (38)                                             |       |
| 1 - no. (%)                          | 3 (20)     | 0 (0)                                   | 3 (38)                                             |       |
| 2 - no. (%)                          | 1 (7)      | 0 (0)                                   | 1 (13)                                             |       |
| Missing data - no. (%)               | 1 (7)      | 0 (0)                                   | 1 (13)                                             |       |
| ECOG performance status              |            |                                         |                                                    | 0.545 |
| 0 - no. (%)                          | 6 (40)     | 3 (43)                                  | 3 (38)                                             |       |
| 1 - no. (%)                          | 5 (33)     | 2 (29)                                  | 3 (38)                                             |       |
| 2 - no. (%)                          | 1 (7)      | 0 (0)                                   | 1 (13)                                             |       |
| 3 - no. (%)                          | 1 (7)      | 1 (14)                                  | 0 (0)                                              |       |
| Missing data - no. (%)               | 2 (13)     | 1 (14)                                  | 1 (13)                                             |       |
| Type of AML                          |            |                                         |                                                    | 0.31  |
| De novo - no. (%)                    | 11 (73)    | 6 (86)                                  | 5 (62)                                             |       |
| Secondary* - no. (%)                 | 4 (27)     | 1 (14)                                  | 3 (38)                                             |       |
| Therapy-induced -no. (%)             | 0 (0)      | 0 (0)                                   | 0 (0)                                              |       |
| Cytogenetic risk group               |            |                                         |                                                    | 0.853 |
| Favorable/intermediate – no. (%)     | 9 (60)     | 5 (71)                                  | 4 (50)                                             |       |
| Adverse – no. (%)                    | 4 (27)     | 2 (29)                                  | 2 (25)                                             |       |
| Missing data - no. (%)               | 2 (13)     | 0 (0)                                   | 2 (25)                                             |       |
| ELN at SAIL screening (9)            |            |                                         |                                                    | 0.079 |
| Favorable/intermediate – no. (%)     | 5 (33)     | 4 (50)                                  | 1 (12)                                             |       |

|                                                             |          |          |          |       |
|-------------------------------------------------------------|----------|----------|----------|-------|
| Unfavorable – no. (%)                                       | 7 (47)   | 2 (25)   | 5 (63)   |       |
| Missing data – no. (%)                                      | 3 (20)   | 2 (25)   | 2 (25)   |       |
| WBC count                                                   |          |          |          | 0.54  |
| Median - (x10 <sup>9</sup> /l)                              | 4.17     | 3.43     | 4.91     |       |
| Range - (x10 <sup>9</sup> /l)                               | 0.6-12.9 | 0.6-12.6 | 0.7-12.9 |       |
| Hemoglobin                                                  |          |          |          | 0.664 |
| Median – g/dL                                               | 9.21     | 9.41     | 9.01     |       |
| Range – g/dL                                                | 7.1-12.5 | 7.1-12.5 | 7.3-11.0 |       |
| Platelet count                                              |          |          |          | 0.443 |
| Median - (x10 <sup>9</sup> /l)                              | 46.64    | 52.71    | 40.57    |       |
| Range - (x10 <sup>9</sup> /l)                               | 10-98    | 15-98    | 10-86    |       |
| Prior HCT                                                   |          |          |          | 0.782 |
| Yes – no. (%)                                               | 8 (53)   | 4 (57)   | 4 (50)   |       |
| No – no. (%)                                                | 7 (47)   | 3 (43)   | 4 (50)   |       |
| AlloHCT after SAIL                                          |          |          |          | 0.833 |
| Yes – no. (%)                                               | 9 (60)   | 4 (57)   | 5 (63)   |       |
| No – no. (%)                                                | 6 (40)   | 3 (43)   | 3 (37)   |       |
| aGVHD in patients receiving an allograft or DLIs (n=12)     |          |          |          | 0.387 |
| Yes – no. (%)                                               | 8 (73)   | 5 (83)   | 3 (60)   |       |
| No – no. (%)                                                | 3 (27)   | 1 (17)   | 2 (40)   |       |
| cGVHD in transplanted receiving an allograft or DLIs (n=12) |          |          |          | 0.621 |
| Yes – no. (%)                                               | 3 (27)   | 2 (33)   | 1 (20)   |       |
| No – no. (%)                                                | 8 (73)   | 4 (67)   | 4 (80)   |       |
| Treatment after SAIL                                        |          |          |          | n.a.  |
| Yes – no. (%)                                               | 15 (100) | 7 (100)  | 8 (100)  |       |
| No – no. (%)                                                | 0 (0)    | 0 (0)    | 0 (0)    |       |
| Type of treatment after SAIL                                |          |          |          | 0.335 |
| AlloHCT- no. (%)                                            | 9 (60)   | 4 (57)   | 5 (62)   |       |
| DLI - no. (%)                                               | 3 (20)   | 2 (29)   | 1 (12)   |       |
| Intensive chemotherapy - no. (%)                            | 2 (13)   | 0 (0)    | 2 (26)   |       |
| Non-intensive chemotherapy - no. (%)                        | 1 (7)    | 1 (14)   | 0 (0)    |       |
| No treatment - no. (%)                                      | 0 (0)    | 0 (0)    | 0 (0)    |       |



Abbreviations: CR, complete remission; CRi, complete remission with incomplete hematologic recovery; MLFS, morphologic leukemia-free state; SD, stable disease; PR, partial remission; PD, progressive disease; ECOG, performance status of the Eastern Cooperative Oncology Group; ELN, European LeukemiaNet; WBC, white blood cell count; HCT, hematopoietic stem cell transplantation; alloHCT, allogeneic hematopoietic stem cell transplantation; aGvHD, acute graft-versus-host disease; cGvHD, chronic graft-versus-host disease; DLI, donor lymphocyte infusion; P, P-value from two-sided chi-squared tests for categorical variables and from two-sided Student's T or Kolmogorov-Smirnov tests for continuous variables.

\* secondary AML developing after an antecedent hematologic disorder;

**Supplementary Table S6. Comparison of molecular characteristics between CR/CRi (n=8) and all other patients (n=10).**

| Mutation class       | Mutated gene       | All (n=15) | CR/Cri after induction n=7 | All others (SD, PR, PD, MLFS, after induction) n=8 | P     |
|----------------------|--------------------|------------|----------------------------|----------------------------------------------------|-------|
| Epigenetic modifiers | <i>ASXL1</i>       |            |                            |                                                    | 0.605 |
|                      | Mutated – no. (%)  | 3 (20)     | 1 (33)                     | 2 (67)                                             |       |
|                      | Wildtype – no. (%) | 12 (80)    | 6 (50)                     | 6 (50)                                             |       |
|                      | <i>ASXL2</i>       |            |                            |                                                    | 0.038 |
|                      | Mutated – no. (%)  | 3 (20)     | 3 (100)                    | 0 (0)                                              |       |
|                      | Wildtype – no. (%) | 12 (80)    | 4 (33)                     | 8 (67)                                             |       |
|                      | <i>DNMT3A</i>      |            |                            |                                                    | 0.605 |
|                      | Mutated – no. (%)  | 3 (20)     | 1 (33)                     | 2 (67)                                             |       |
|                      | Wildtype – no. (%) | 12 (80)    | 6 (50)                     | 6 (50)                                             |       |
|                      | <i>IDH2</i>        |            |                            |                                                    | 0.333 |
|                      | Mutated – no. (%)  | 1 (7)      | 0 (0)                      | 1 (100)                                            |       |
|                      | Wildtype – no. (%) | 14 (93)    | 7 (50)                     | 7 (50)                                             |       |
|                      | <i>KDM6A</i>       |            |                            |                                                    | 0.333 |
|                      | Mutated – no. (%)  | 1 (7)      | 0 (0)                      | 1 (100)                                            |       |
|                      | Wildtype – no. (%) | 14 (93)    | 7 (50)                     | 7 (50)                                             |       |
|                      | <i>TET2</i>        |            |                            |                                                    | 0.605 |

|                                |                       |          |         |         |       |
|--------------------------------|-----------------------|----------|---------|---------|-------|
|                                | Mutated – no. (%)     | 3 (20)   | 1 (33)  | 2 (67)  |       |
|                                | Wildtype – no. (%)    | 12 (80)  | 6 (50)  | 6 (50)  |       |
| <b>Nucleo-<br/>phosmin</b>     | <i>NPM1</i> – no. (%) |          |         |         | 0.919 |
|                                | Mutated – no. (%)     | 2 (13)   | 1 (50)  | 1 (50)  |       |
|                                | Wildtype – no. (%)    | 13 (87)  | 6 (46)  | 7 (54)  |       |
| <b>Cohesin<br/>complex</b>     | <i>RAD21</i>          |          |         |         | n.a.  |
|                                | Mutated – no. (%)     | 0 (0)    | 0 (0)   | 0 (0)   |       |
|                                | Wildtype – no. (%)    | 15 (100) | 7 (100) | 8 (100) |       |
|                                | <i>SMC1A</i>          |          |         |         | 0.333 |
|                                | Mutated – no. (%)     | 1 (7)    | 0 (0)   | 1 (100) |       |
|                                | Wildtype – no. (%)    | 14 (93)  | 7 (50)  | 7 (50)  |       |
| <b>Signal<br/>transduction</b> | <i>CBL</i>            |          |         |         | 0.333 |
|                                | Mutated – no. (%)     | 1 (7)    | 0 (0)   | 1 (100) |       |
|                                | Wildtype – no. (%)    | 14 (93)  | 7 (50)  | 7 (50)  |       |
|                                | <i>FLT3</i> – no. (%) |          |         |         | 0.104 |
|                                | Mutated – no. (%)     | 2 (13)   | 2 (100) | 0 (0)   |       |
|                                | Wildtype – no. (%)    | 13 (87)  | 5 (38)  | 8 (62)  |       |
|                                | <i>KRAS</i>           |          |         |         | 0.333 |
|                                | Mutated – no. (%)     | 1 (7)    | 0 (0)   | 1 (100) |       |
|                                | Wildtype – no. (%)    | 14 (93)  | 7 (50)  | 7 (50)  |       |
|                                | <i>NF1</i>            |          |         |         | 0.333 |
|                                | Mutated – no. (%)     | 1 (7)    | 0 (0)   | 1 (100) |       |
|                                | Wildtype – no. (%)    | 14 (93)  | 7 (50)  | 7 (50)  |       |
|                                | <i>PTPN11</i>         |          |         |         | 0.919 |
|                                | Mutated – no. (%)     | 2 (13)   | 1 (50)  | 1 (50)  |       |
|                                | Wildtype – no. (%)    | 13 (87)  | 6 (46)  | 7 (54)  |       |
| <b>Spliceosome</b>             | <i>SF3B1</i>          |          |         |         | 0.919 |
|                                | Mutated – no. (%)     | 2 (13)   | 1 (50)  | 1 (50)  |       |
|                                | Wildtype – no. (%)    | 13 (87)  | 6 (46)  | 7 (54)  |       |
|                                | <i>SRSF2</i>          |          |         |         | 0.605 |
|                                | Mutated – no. (%)     | 3 (20)   | 1 (33)  | 2 (67)  |       |
|                                | Wildtype – no. (%)    | 12 (80)  | 6 (50)  | 6 (50)  |       |
|                                | <i>U2AF1</i>          |          |         |         | 0.333 |
|                                | Mutated – no. (%)     | 1 (7)    | 0 (0)   | 1 (100) |       |
|                                | Wildtype – no. (%)    | 14 (93)  | 7 (50)  | 7 (50)  |       |
|                                | <i>ZBTB7A</i>         |          |         |         | 0.268 |
|                                | Mutated – no. (%)     | 1 (7)    | 1 (100) | 0 (0)   |       |
| Wildtype – no. (%)             | 14 (93)               | 6 (43)   | 8 (57)  |         |       |
| <b>Myeloid TF's</b>            | <i>BCOR</i>           |          |         |         | 0.333 |
|                                | Mutated – no. (%)     | 1 (7)    | 0 (0)   | 1 (100) |       |
|                                | Wildtype – no. (%)    | 14 (93)  | 7 (50)  | 7 (50)  |       |

|                          |                    |         |         |         |       |
|--------------------------|--------------------|---------|---------|---------|-------|
|                          | <i>CEBPA</i>       |         |         |         | 0.333 |
|                          | Mutated – no. (%)  | 1 (7)   | 0 (0)   | 1 (100) |       |
|                          | Wildtype – no. (%) | 14 (93) | 7 (50)  | 7 (50)  |       |
|                          | <i>CUX1</i>        |         |         |         | 0.070 |
|                          | Mutated – no. (%)  | 3 (20)  | 0 (0)   | 3 (100) |       |
|                          | Wildtype – no. (%) | 12 (80) | 7 (58)  | 5 (42)  |       |
|                          | <i>GATA2</i>       |         |         |         | 0.919 |
|                          | Mutated – no. (%)  | 2 (13)  | 1 (50)  | 1 (50)  |       |
|                          | Wildtype – no. (%) | 13 (87) | 6 (46)  | 7 (54)  |       |
|                          | <i>RUNX1</i>       |         |         |         | 0.31  |
|                          | Mutated – no. (%)  | 4 (27)  | 1 (25)  | 3 (75)  |       |
|                          | Wildtype – no. (%) | 11 (73) | 6 (55)  | 5 (45)  |       |
|                          | <i>SETBP1</i>      |         |         |         | 0.333 |
|                          | Mutated – no. (%)  | 1 (7)   | 0 (0)   | 1 (100) |       |
|                          | Wildtype – no. (%) | 14 (93) | 7 (50)  | 7 (50)  |       |
| <b>Tumor suppressors</b> | <i>PPM1D</i>       |         |         |         | 0.333 |
|                          | Mutated – no. (%)  | 1 (7)   | 0 (0)   | 1 (100) |       |
|                          | Wildtype – no. (%) | 14 (93) | 7 (50)  | 7 (50)  |       |
|                          | <i>TP53</i>        |         |         |         | 0.104 |
|                          | Mutated – no. (%)  | 2 (13)  | 2 (100) | 0 (0)   |       |
|                          | Wildtype – no. (%) | 13 (87) | 5 (38)  | 8 (62)  |       |
|                          | <i>WT1</i>         |         |         |         | 0.155 |
|                          | Mutated – no. (%)  | 2 (13)  | 0 (0)   | 2 (100) |       |
| Wildtype – no. (%)       | 13 (87)            | 7 (54)  | 6 (46)  |         |       |

Abbreviations: CR, complete remission; CRi, complete remission with incomplete hematologic recovery; MLFS, morphologic leukemia-free state; SD, stable disease; PR, partial remission; PD, progressive disease; P, P-value from two-sided chi-squared tests for categorical variables; TF, transcription factor.

**Supplementary Table S7. Response patterns of gene mutations under SAIL treatment.**

| <b>Gene</b>   | <b>Molecular Response association</b> | <b>Based on number of patients (n)</b> |
|---------------|---------------------------------------|----------------------------------------|
| <i>RUNX1</i>  | Molecular non-response                | 4                                      |
| <i>GATA2</i>  | Molecular non-response                | 2                                      |
| <i>TET2</i>   | Molecular non-response                | 3                                      |
| <i>ASXL1</i>  | Molecular non-response                | 3                                      |
| <i>ASXL2</i>  | Molecular non-response                | 3                                      |
| <i>BCOR</i>   | Molecular non-response                | 1                                      |
| <i>CUX1</i>   | Molecular non-response                | 3                                      |
| <i>DNMT3A</i> | Molecular non-response                | 3                                      |
| <i>FLT3</i>   | Molecular response                    | 2                                      |
| <i>NPM1</i>   | Molecular non-response                | 2                                      |
| <i>PTPN11</i> | Molecular non-response                | 2                                      |
| <i>SRSF2</i>  | Molecular non-response                | 3                                      |
| <i>TP53</i>   | Molecular response                    | 2                                      |
| <i>SF3B1</i>  | Molecular response                    | 2                                      |
| <i>WT1</i>    | Molecular non-response                | 2                                      |

Note: Molecular response was defined as VAF negativity in the follow-up sample after SAIL treatment in comparison to the relapse sample.

**Supplementary Table S8. Univariate Analysis for OS and EFS in 15 SAIL patients.**

| <b>Endpoint</b> | <b>Variables in the model</b>       | <b>Univariate analysis</b> |               |              |
|-----------------|-------------------------------------|----------------------------|---------------|--------------|
|                 |                                     | <b>HR</b>                  | <b>95% CI</b> | <b>P</b>     |
| OS              | Age <median vs >median              | 0.129                      | 0.025-0.666   | <b>0.014</b> |
|                 | Male vs. female                     | 0.513                      | 0.144-1.832   | 0.304        |
|                 | ECOG at SAIL screening 0 or 1 vs. 2 | 0.500                      | 0.100-2.496   | 0.398        |

|     |                                                          |       |              |              |
|-----|----------------------------------------------------------|-------|--------------|--------------|
|     | alloHCT after SAIL yes vs. no                            | 0.331 | 0.094-1.172  | 0.087        |
|     | Type of AML primary vs. secondary/therapy-induced        | 0.222 | 0.055-0.906  | <b>0.036</b> |
|     | Hemoglobin (g/dL) <median vs. >median                    | 2.096 | 0.580-7.571  | 0.259        |
|     | WBC count (x10 <sup>9</sup> /l) <median vs. >median      | 0.713 | 0.201-2.529  | 0.601        |
|     | Platelet count (x10 <sup>9</sup> /l) <median vs. >median | 1.828 | 0.504-6.635  | 0.359        |
|     | <i>FLT3</i> mut vs wt                                    | 0.770 | 0.096-6.184  | 0.805        |
|     | <i>ASXL1</i> mut vs wt                                   | 0.770 | 0.162-3.661  | 0.743        |
|     | <i>ASXL2</i> mut vs wt                                   | 0.727 | 0.150-3.528  | 0.693        |
|     | <i>CUX1</i> mut vs wt                                    | 1.137 | 0.235-5.502  | 0.873        |
|     | <i>DNMT3A</i> mut vs wt                                  | 1.354 | 0.279-6.585  | 0.707        |
|     | <i>GATA2</i> mut vs wt                                   | 0.519 | 0.064-4.189  | 0.538        |
|     | <i>SRSF2</i> mut vs wt                                   | 0.964 | 0.204-4.564  | 0.963        |
|     | <i>TET2</i> mut vs wt                                    | 3.881 | 0.914-16.470 | 0.066        |
|     | <i>TP53</i> mut vs wt                                    | 4.351 | 0.787-24.066 | 0.092        |
|     |                                                          |       |              |              |
| EFS | Age <median vs >median                                   | 0.485 | 0.079-2.966  | 0.433        |
|     | Male vs. female                                          | 0.704 | 0.116-4.265  | 0.703        |
|     | ECOG at SAIL 0 and 1 vs. 2 and 3                         | 0.289 | 0.018-4.648  | 0.381        |
|     | alloHCT after SAIL yes vs. no                            | 0.134 | 0.012-1.507  | 0.104        |
|     | Type of AML primary vs. secondary/therapy-induced        | 1.122 | 0.122-10.328 | 0.919        |
|     | Hemoglobin (g/dL) <median vs. >median                    | 3.934 | 0.422-36.690 | 0.229        |
|     | WBC count (x10 <sup>9</sup> /l) <median vs. >median      | 0.696 | 0.113-4.270  | 0.695        |
|     | Platelet count (x10 <sup>9</sup> /l) <median vs. >median | 1.605 | 0.261-9.872  | 0.610        |
|     | <i>FLT3</i> mut vs wt                                    | 2.179 | 0.302-15.721 | 0.440        |

|  |                         |       |                 |       |
|--|-------------------------|-------|-----------------|-------|
|  | <i>DNMT3A</i> mut vs wt | 0.296 | 0.031-<br>2.827 | 0.290 |
|  | <i>GATA2</i> mut vs wt  | 0.638 | 0.071-<br>5.772 | 0.689 |
|  | <i>TP53</i> mut vs wt   | 1.420 | 0.234-<br>8.597 | 0.703 |

Note: Genes were considered for univariate analysis if they were detectable in at least 3 patients. Hazard ratios greater than or less than 1 indicate an increased or decreased risk, respectively, of an event for the first category listed.

Patient number was too small for a useful calculation for the following variables: *BCOR*, *CBL*, *CEBPA*, *IHD2*, *KDM6A*, *KRAS*, *NF1*, *PPM1D*, *RAD21*, *RUNX1*, *SETBP1*, *SMC1A*, *TET2*, *U2AF1*, *ZBTB7A*.

**Supplementary Figures**

**Supplementary Figure S1. Consort diagram of studied patients.**

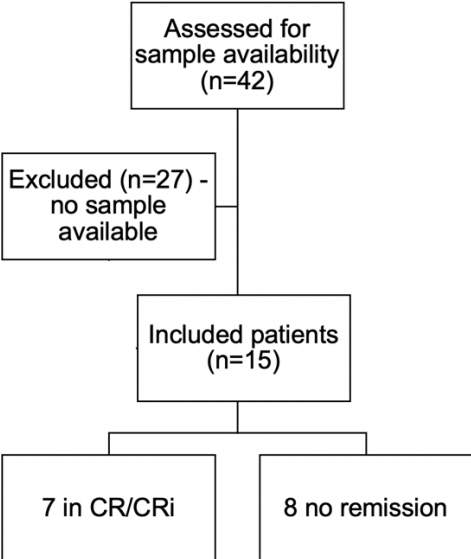

**Supplementary Figure S2. Comparison of (A) EFS and (B) OS between included and excluded patients.**

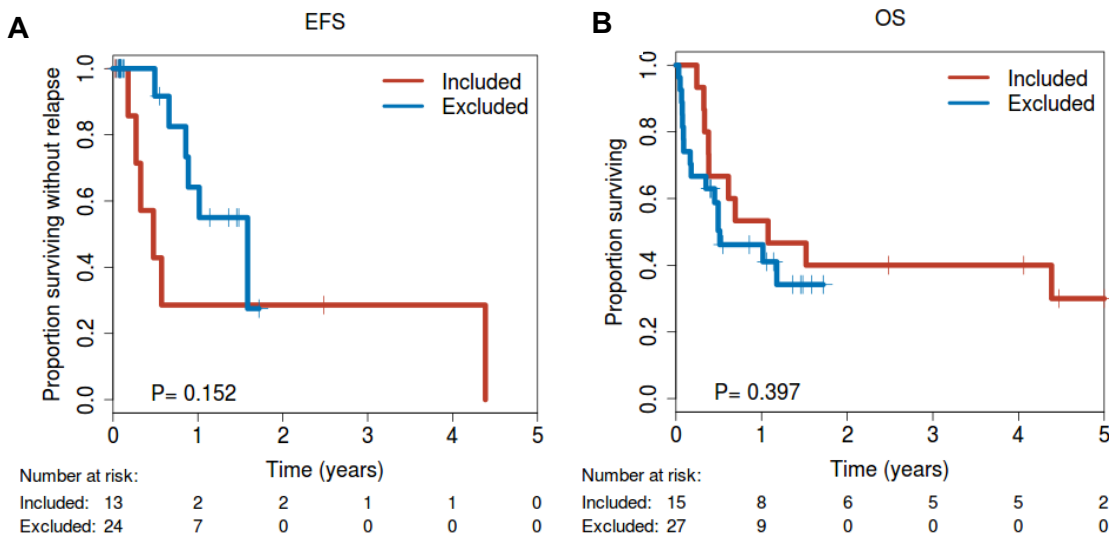

**Supplementary Figure S3. Patient-specific clonal evolution from diagnosis to relapse/refractoriness and follow-up after cycle one of SAIL treatment.**

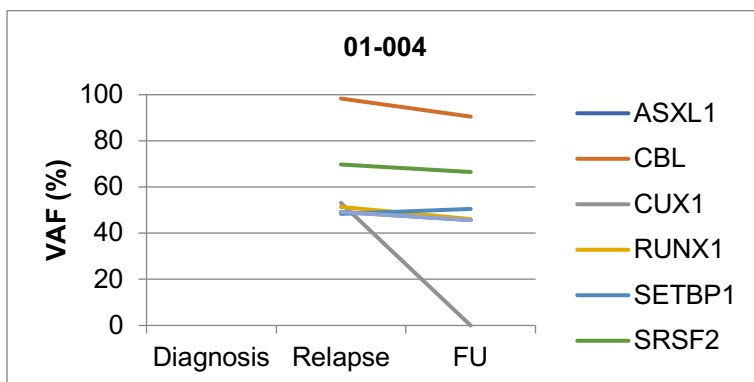



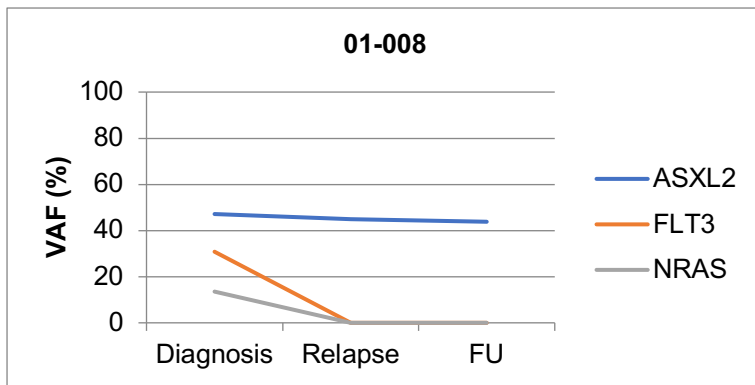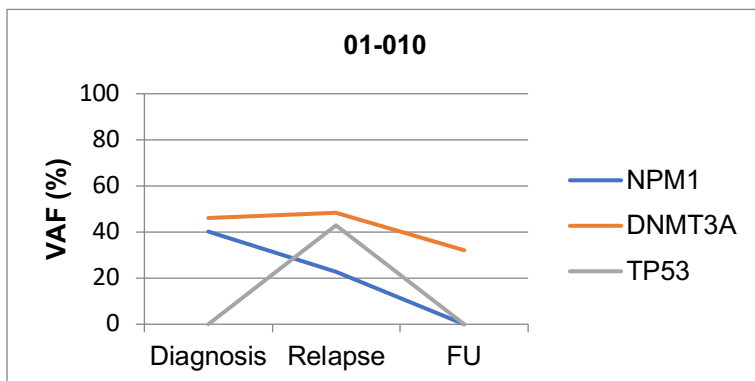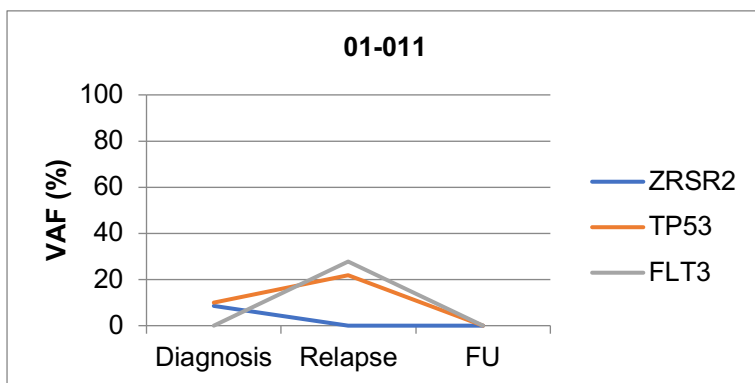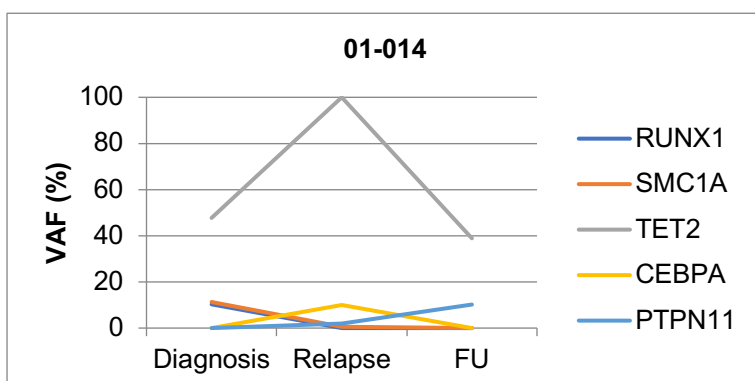

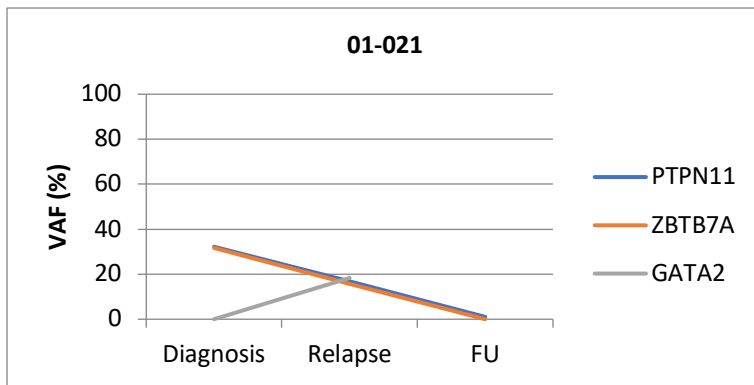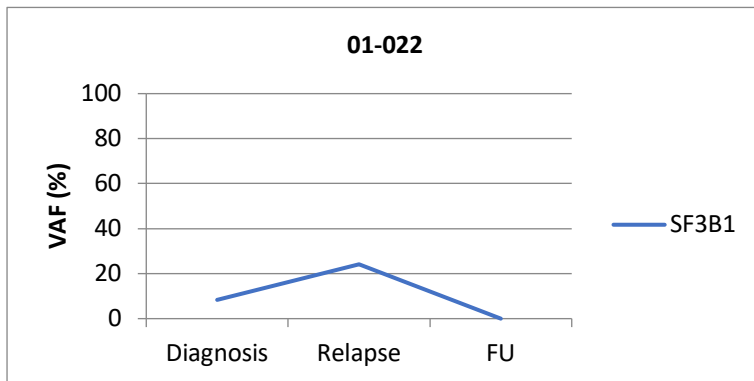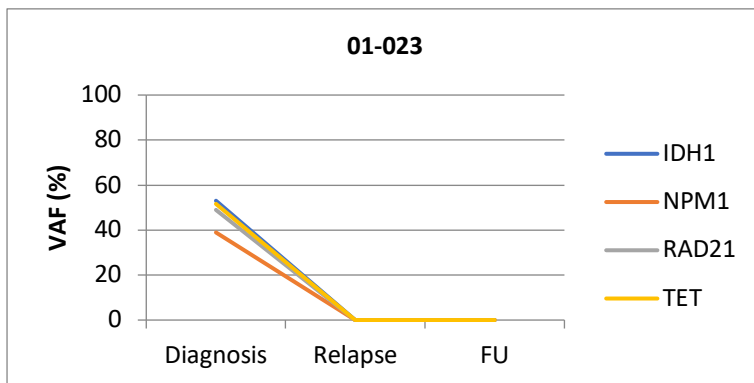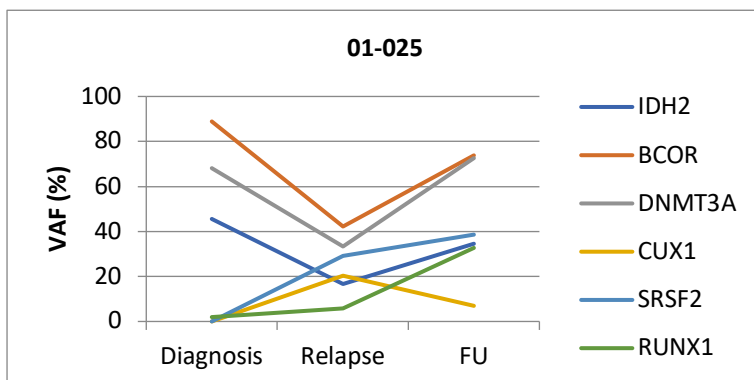

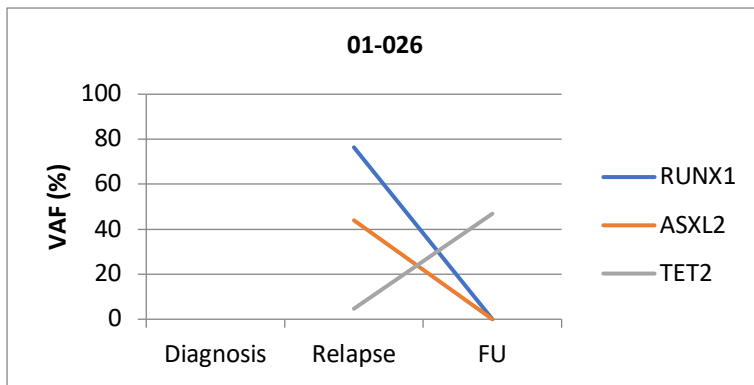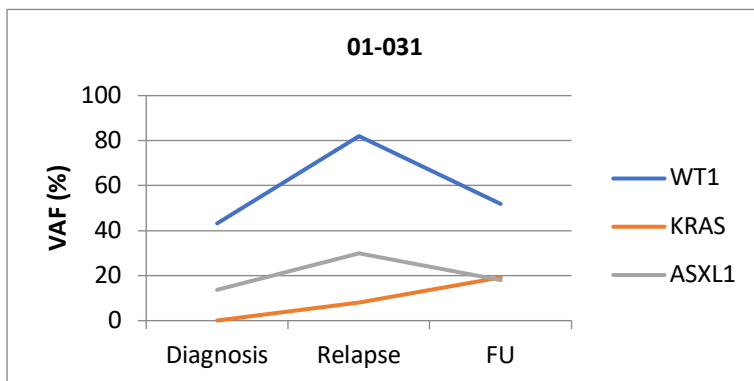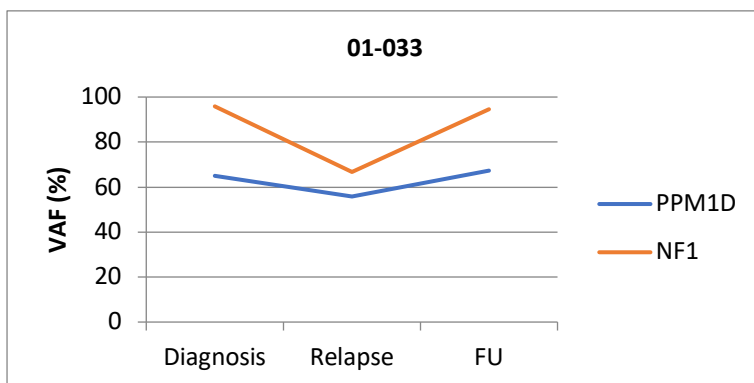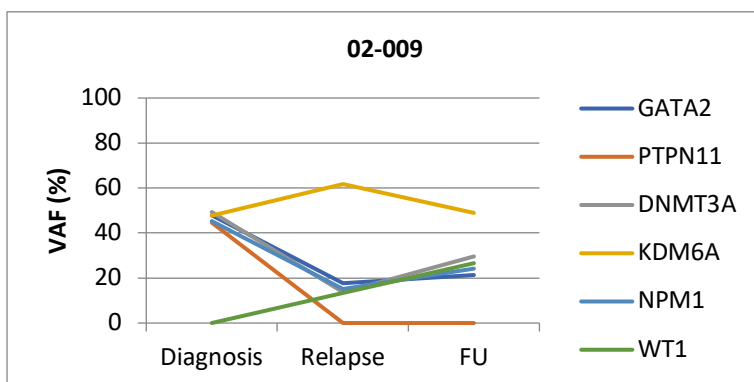

**Supplementary Figure S4. OS of patients undergoing alloHCT after SAIL induction vs all other patients.**

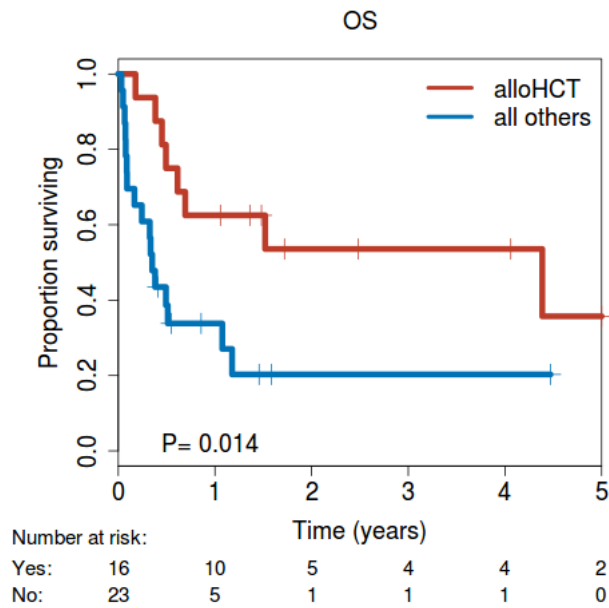

**Supplementary Figure S5. OS in patients achieving CR/CRi vs. patients with other response to SAIL induction therapy.**

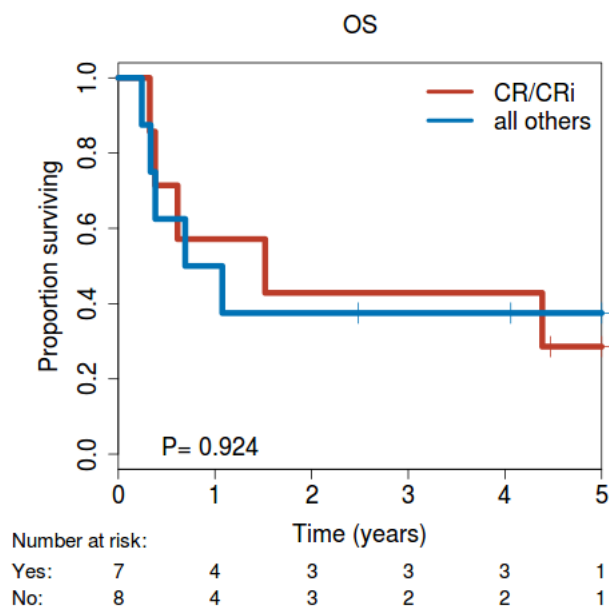

**Supplementary Figure S6. OS in patients with declining and persisting clones after one cycle of SAIL treatment.**

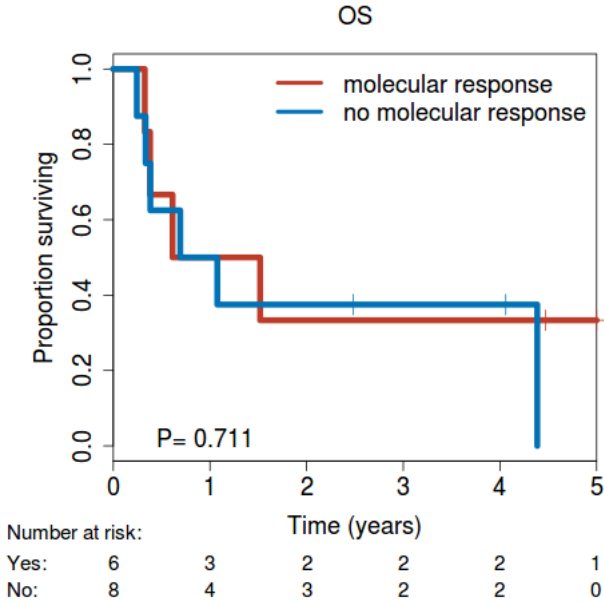

Supplement: 277_2022_5075_MOESM1_ESM.pdf [file 277_2022_5075_MOESM1_ESM.pdf]
